# Supplementary material for: Circulatory Metabolite Ratios as Indicators of Lifestyle Risk Factors Based on a Greek NAFLD Case–Control Study
Source: MDPI journal article supplement (doi:10.3390/nu16081235), 2024-04-21
Supplement: s1 [file s1]

Supplementary Figure S1 a. Permutation testing with 999 permutations. b. ROC curves

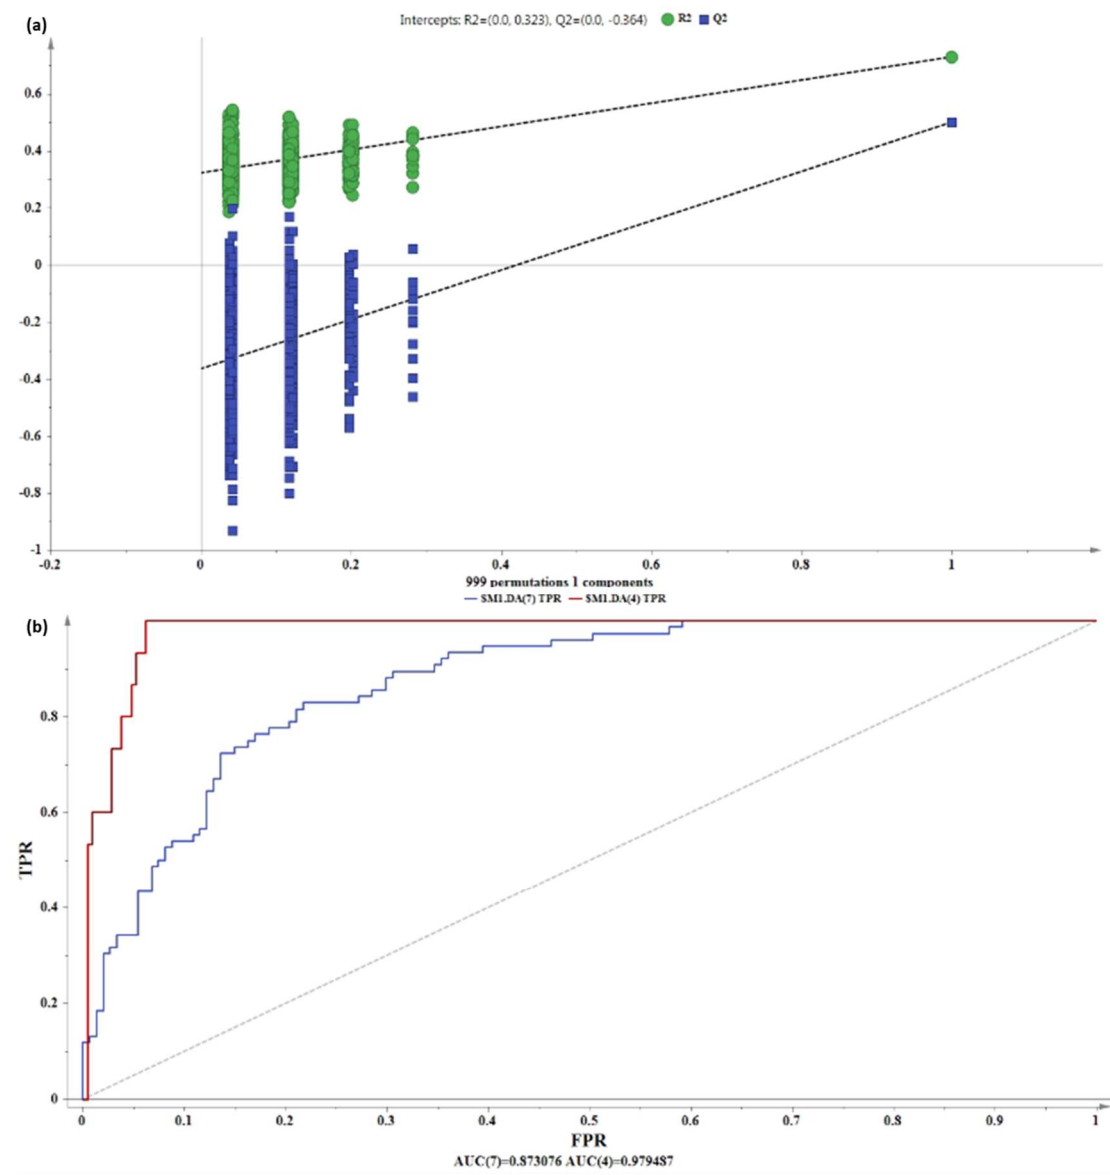

**Supplementary Figure S2** Box plots and ROC curves ( $0.8 > \text{AUROC} > 0.7$ ) for each metabolite differentially abundant between lifestyle 3-4 and 7-8

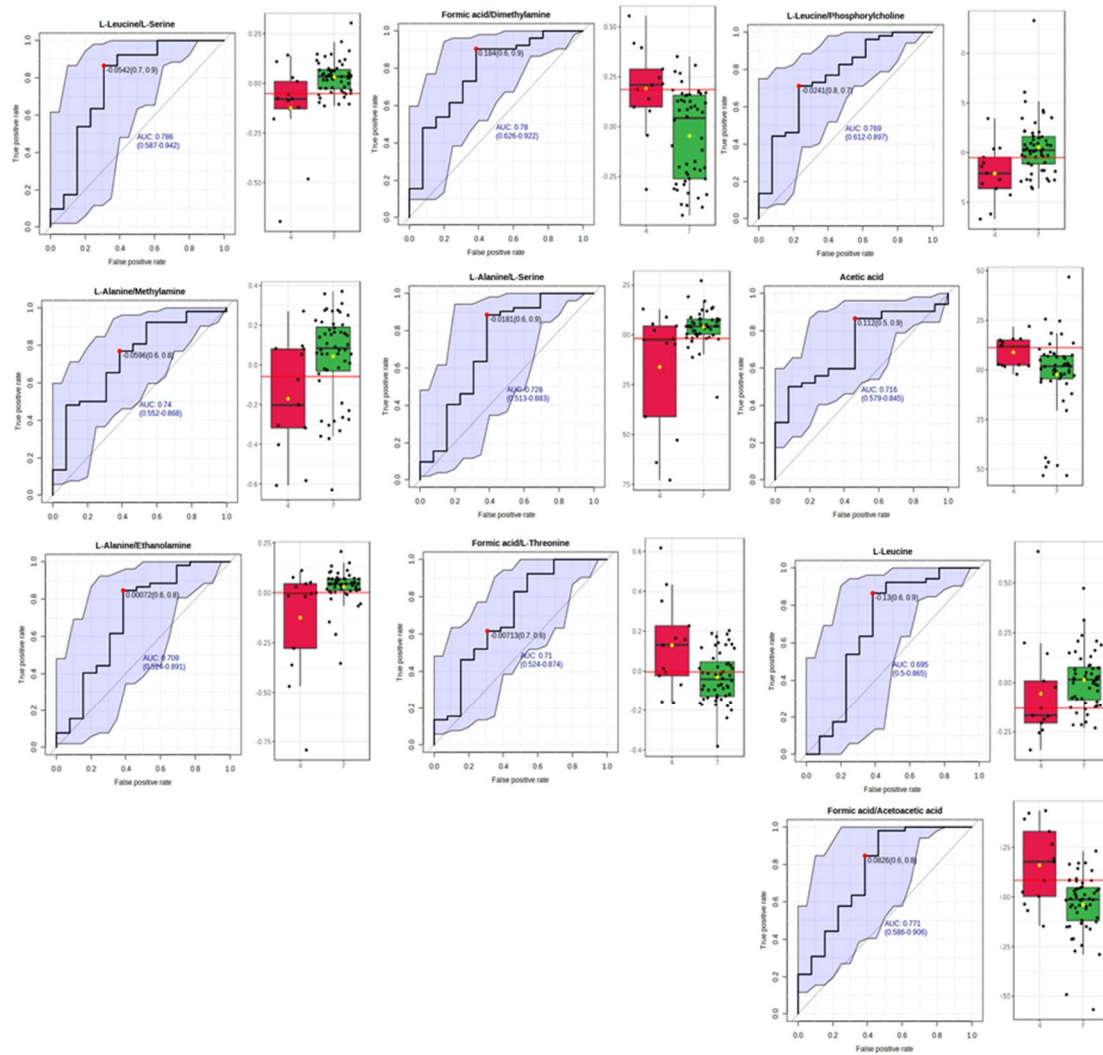

**Supplementary Table S1** A summary of the primary disturbed statistically significant pathways ( $p < 0.05$ ),

| Pathway Name                                                        | Match Status | p        | -log(p) | Holm p   | FDR      | Impact |
|---------------------------------------------------------------------|--------------|----------|---------|----------|----------|--------|
| <a href="#">Aminoacyl-tRNA biosynthesis</a>                         | 3/48         | 1,09E+00 | 39.616  | 0.009177 | 0.009177 | 0.0    |
| <a href="#">Phenylalanine, tyrosine and tryptophan biosynthesis</a> | 1/4          | 0.010293 | 19.875  | 0.85429  | 0.42978  | 0.5    |
| <a href="#">Valine, leucine and isoleucine biosynthesis</a>         | 1/8          | 0.020506 | 16.881  | 1.0      | 0.42978  | 0.0    |
| <a href="#">Ubiquinone and other terpenoid-quinone biosynthesis</a> | 1/9          | 0.023046 | 16.374  | 1.0      | 0.42978  | 0.0    |
| <a href="#">Phenylalanine metabolism</a>                            | 1/10         | 0.025582 | 15.921  | 1.0      | 0.42978  | 0.0    |

**Supplementary Table S2** Metabolite enrichment analysis to uncover potential associations of lifestyle with other medical conditions

| Metabolite Set                                             | Total | Hits | Expect | P value | Holm P | FDR   |
|------------------------------------------------------------|-------|------|--------|---------|--------|-------|
| DIFFERENT SEIZURE DISORDERS                                | 24    | 3    | 0.2    | 4.3E-4  | 0.117  | 0.117 |
| PHENYLKETONURIA                                            | 7     | 2    | 0.0585 | 0.00109 | 0.295  | 0.148 |
| HEART FAILURE                                              | 10    | 2    | 0.0835 | 0.00231 | 0.625  | 0.157 |
| REFRACTORY LOCALIZATION-RELATED EPILEPSY                   | 10    | 2    | 0.0835 | 0.00231 | 0.625  | 0.157 |
| ACUTE SEIZURES                                             | 14    | 2    | 0.117  | 0.00461 | 1.0    | 0.207 |
| EARLY MARKERS OF MYOCARDIAL INJURY                         | 14    | 2    | 0.117  | 0.00461 | 1.0    | 0.207 |
| SCHIZOPHRENIA                                              | 26    | 2    | 0.217  | 0.0159  | 1.0    | 0.413 |
| INFLAMMATORY DISEASES                                      | 2     | 1    | 0.0167 | 0.0166  | 1.0    | 0.413 |
| LEIGH'S SYNDROME, SUBACUTE NECROTIZING ENCEPHALOPATHY, SNE | 2     | 1    | 0.0167 | 0.0166  | 1.0    | 0.413 |
| METHANOL POISONING                                         | 2     | 1    | 0.0167 | 0.0166  | 1.0    | 0.413 |
| DENGUE FEVER                                               | 3     | 1    | 0.0251 | 0.0249  | 1.0    | 0.485 |
| HAWKINSINURIA                                              | 3     | 1    | 0.0251 | 0.0249  | 1.0    | 0.485 |
| PYRUVATE DEHYDROGENASE E3-BINDING PROTEIN DEFICIENCY       | 3     | 1    | 0.0251 | 0.0249  | 1.0    | 0.485 |
| MYOCARDIAL INFARCTION                                      | 4     | 1    | 0.0334 | 0.0331  | 1.0    | 0.563 |
| FRUCTOSE-1,6-DIPHOSPHATASE DEFICIENCY                      | 5     | 1    | 0.0418 | 0.0412  | 1.0    | 0.563 |
| N-ACETYLGLUTAMATE SYNTHETASE DEFICIENCY, NAGS DEFICIENCY   | 5     | 1    | 0.0418 | 0.0412  | 1.0    | 0.563 |
| POST TRANSURETHRAL PROSTATIC RESECTION                     | 5     | 1    | 0.0418 | 0.0412  | 1.0    | 0.563 |
| TYROSINEMIA I                                              | 5     | 1    | 0.0418 | 0.0412  | 1.0    | 0.563 |
| METABOLITES AFFECTED BY EXERCISE                           | 5     | 1    | 0.0418 | 0.0412  | 1.0    | 0.563 |
